# Supplementary material
Source: MDPI journal article supplement (https://www.mdpi.com/2071-1050/15/22/15741)
Supplement: s1 [file s1 › sustainability-2603668-supplementary.pdf]

Supplementary Table S1. Soil magnesium levels from rice fields in Texas.

| <b>Sample ID</b> | <b>Field Collected</b>                                   | <b>Magnesium<br/>Concentration (ppm)</b> |
|------------------|----------------------------------------------------------|------------------------------------------|
| 1                | Soil sample collected from a rice field in TX<br>in 2021 | 1978                                     |
| 2                | Soil sample collected from a rice field in TX<br>in 2021 | 1176                                     |
| 3                | Soil sample collected from a rice field in TX<br>in 2021 | 1554                                     |
| 4                | Soil sample collected from a rice field in TX<br>in 2021 | 2010                                     |
| 5                | Soil sample collected from a rice field in TX<br>in 2021 | 2430                                     |
